# Supplementary material for: Draft Genome of Scalindua rubra, Obtained from the Interface Above the Discovery Deep Brine in the Red Sea, Sheds Light on Potential Salt Adaptation Strategies in Anammox Bacteria
Source: PubMed Central journal article supplement (PMC5486813; doi:10.1007/s00248-017-0929-7), 2017-01-10
Supplement: 248_2017_929_MOESM1_ESM.pdf [file 248_2017_929_MOESM1_ESM.pdf]

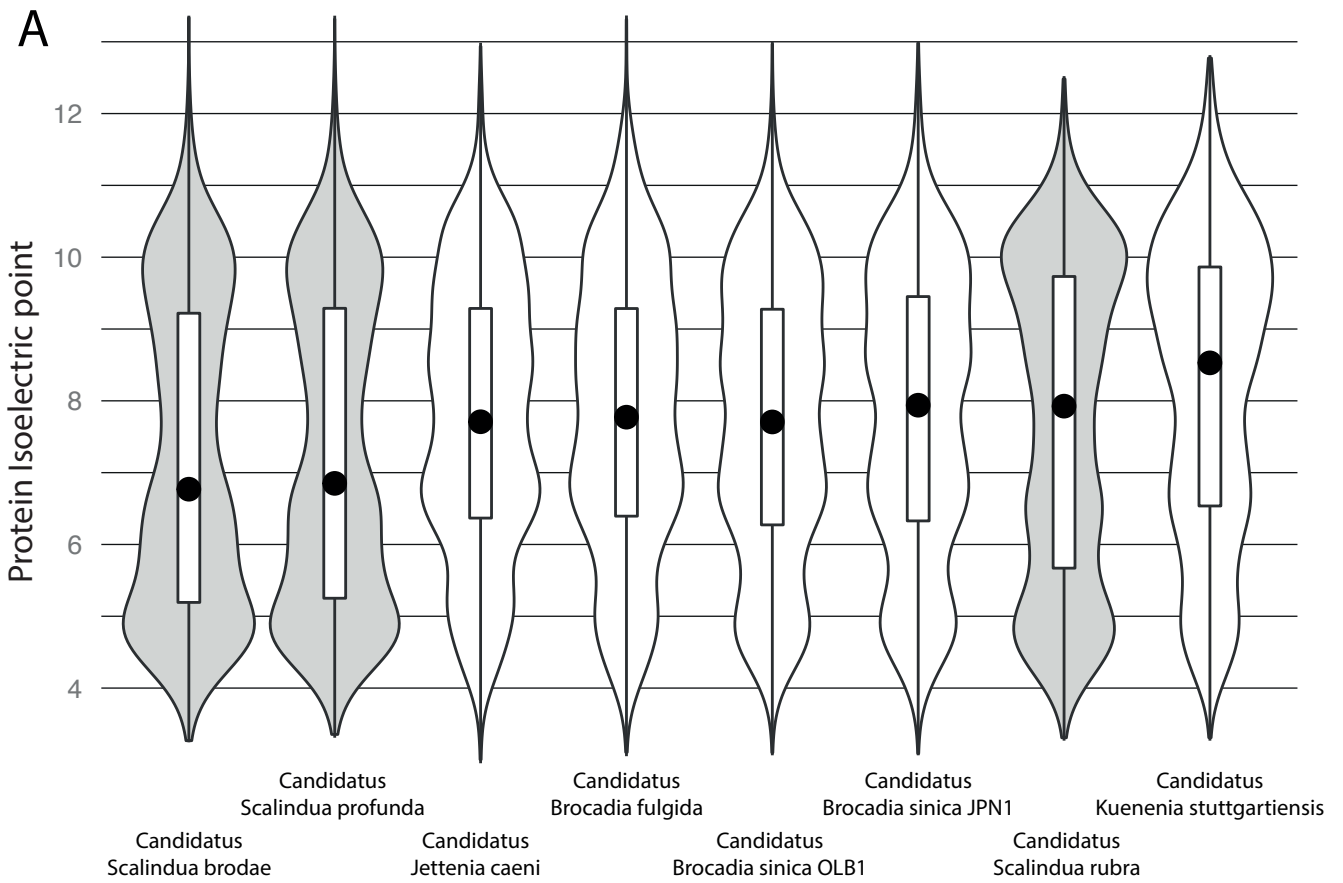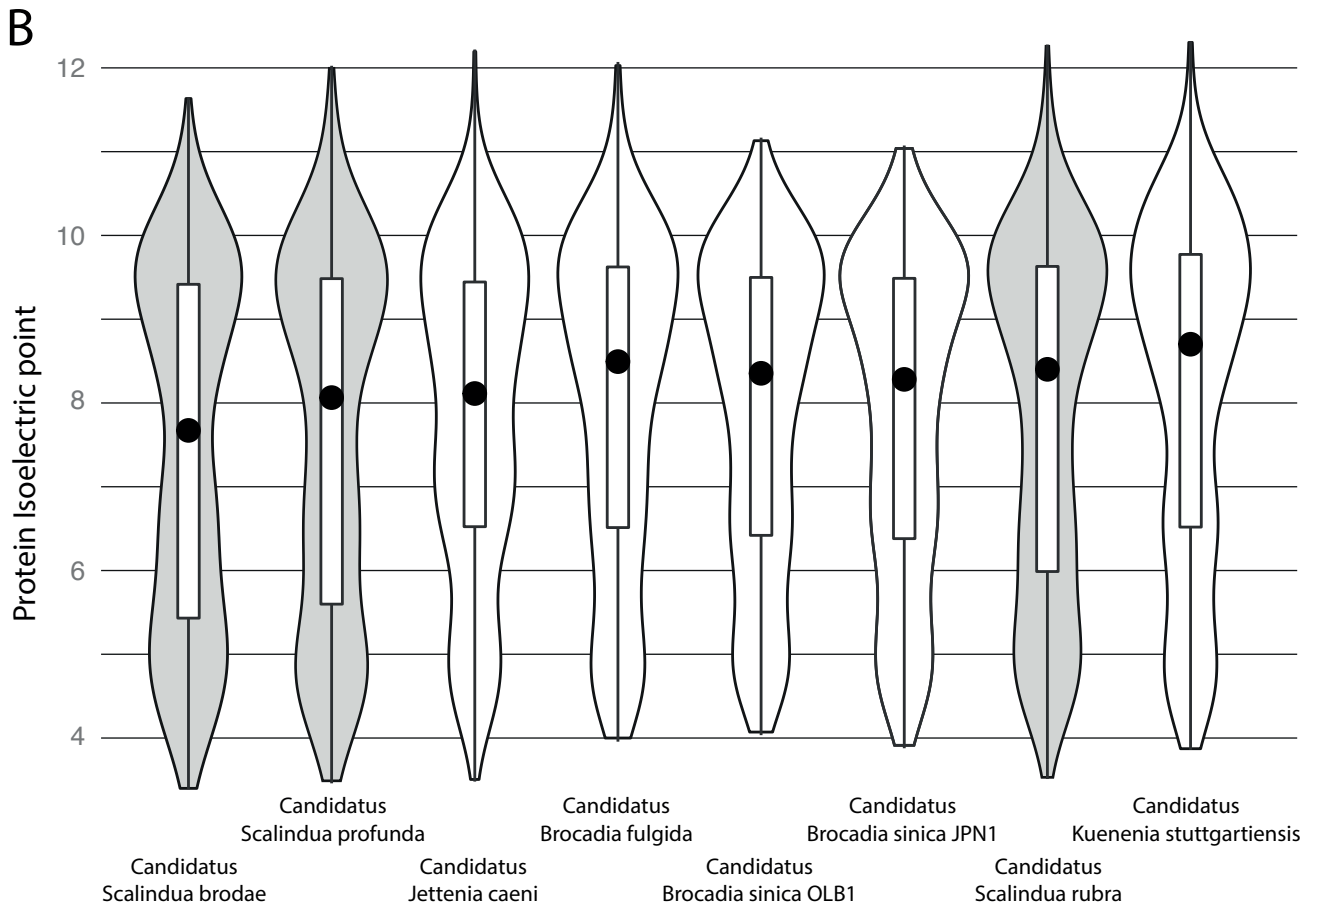

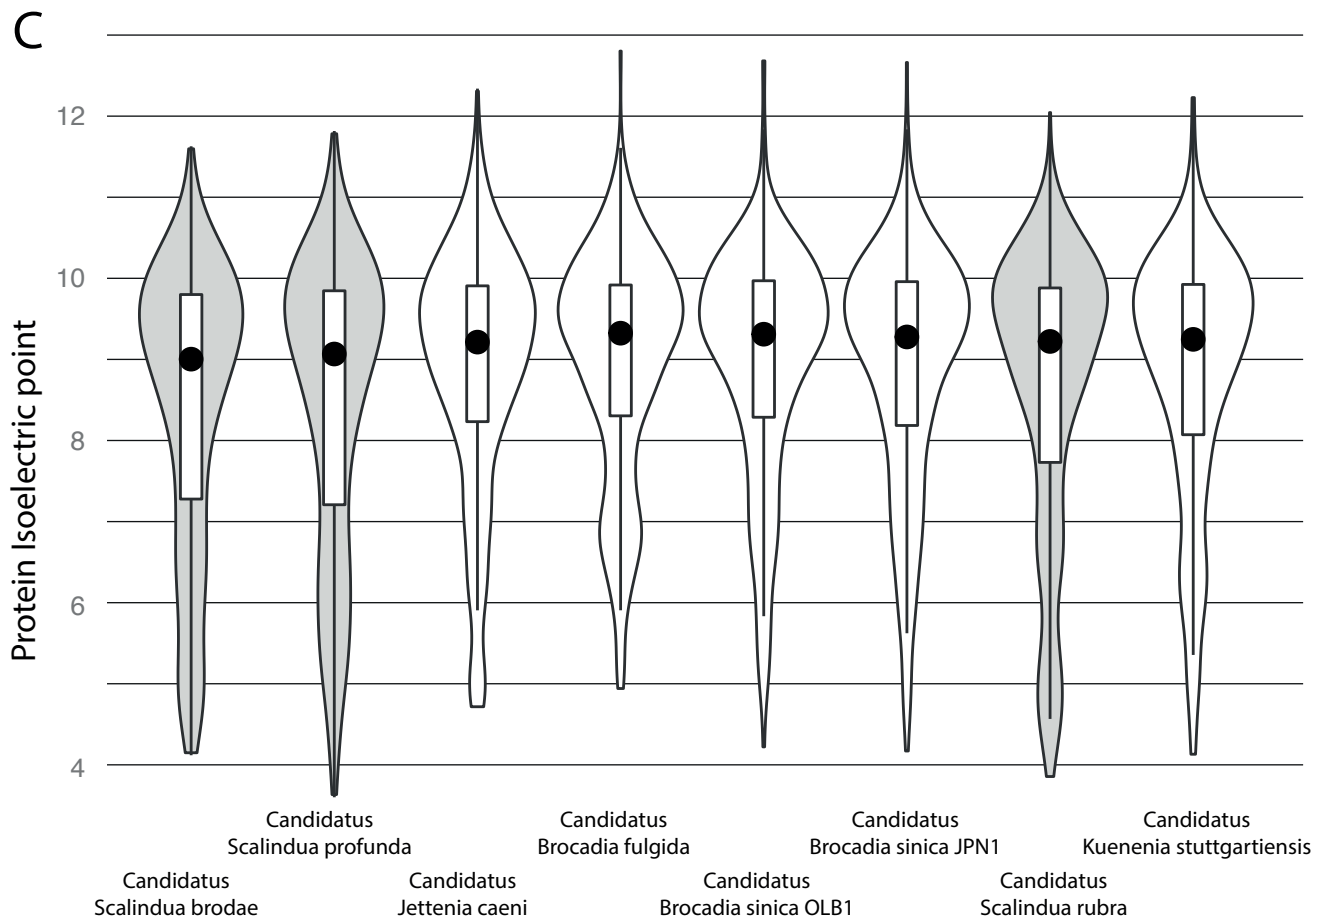

**Supplemental figure S1.** Protein isoelectric point distribution in eight genomes of anammox bacteria. Violin plots indicating the isoelectric point distribution of proteins in eight available anammox genomes with:

- A) no predicted transmembrane helices or signal peptides
- B) one predicted transmembrane helix or signal peptide
- C) two or more predicted transmembrane helices

The organisms are ordered as in Figure 2, from lowest to highest median isoelectric point of the total protein set. Box plots (white bars) indicate 50% of the values around the median, indicated by a black circle. The three available genomes of *Scalindua* sp. are indicated by grey shading.
